# Supplementary material for: Amygdalin Alleviates DSS-Induced Colitis by Restricting Cell Death and Inflammatory Response, Maintaining the Intestinal Barrier, and Modulating Intestinal Flora
Source: MDPI journal article supplement (doi:10.3390/cells13050444), 2024-03-03
Supplement: s1 [file s1]

**Table S1.** Information on the antibodies used in this study.

| Antibody       | Manufacturers                | Catalog number | Dilution ratio |
|----------------|------------------------------|----------------|----------------|
| BAX            | Proteintech                  | 50599-2-Ig     | 1: 2000        |
| $\beta$ -actin | Proteintech                  | 66009-1-Ig     | 1: 8000        |
| Bcl-2          | Proteintech                  | 68103-1-Ig     | 1: 2000        |
| caspase3       | Cell Signaling<br>Technology | #9662          | 1: 1000        |
| claudin-3      | Abcam                        | ab15102        | 1: 4000        |
| COX-2          | Proteintech                  | 66351-1-Ig     | 1: 4000        |
| ERK1/2         | Proteintech                  | 11257-1-AP     | 1: 4000        |
| FSP1           | Proteintech                  | 20886-1-AP     | 1: 2000        |
| FTH            | Santa Cruz<br>Biotechnology  | sc-376594      | 1: 2000        |
| FTL            | Santa Cruz<br>Biotechnology  | sc-74513       | 1: 2000        |
| GPX4           | Santa Cruz<br>Biotechnology  | sc-166570      | 1: 2000        |
| I $\kappa$ B   | Proteintech                  | 10268-1-AP     | 1: 2000        |
| iNOS           | Proteintech                  | 18985-1-AP     | 1: 800         |
| JNK1/2         | Cell Signaling<br>Technology | #9252          | 1: 1000        |
| Nrf2           | Proteintech                  | 16396-1-AP     | 1: 2000        |

---

|                                                             |                              |            |         |
|-------------------------------------------------------------|------------------------------|------------|---------|
| occludin                                                    | Proteintech                  | 27260-1-AP | 1: 2000 |
| p38                                                         | Cell Signaling<br>Technology | #8690      | 1: 2000 |
| p65                                                         | Cell Signaling<br>Technology | #8242      | 1: 1000 |
| p-ERK1/2                                                    | Cell Signaling<br>Technology | #4370      | 1: 1000 |
| p-IκB                                                       | Cell Signaling<br>Technology | #2859      | 1: 800  |
| p-JNK1/2                                                    | Cell Signaling<br>Technology | #9251      | 1: 500  |
| p-p38                                                       | Santa Cruz<br>Biotechnology  | sc-166182  | 1: 2000 |
| p-p65                                                       | Cell Signaling<br>Technology | #3033      | 1: 1000 |
| TLR4                                                        | Santa Cruz<br>Biotechnology  | sc-293072  | 1: 200  |
| xCT                                                         | Proteintech                  | 26864-1-AP | 1: 1000 |
| ZO-1                                                        | Proteintech                  | 21773-1-AP | 1: 4000 |
| HRP-Conjugated<br>AffiniPure Goat Anti-<br>mouse IgG (H+L)  | Bosterbio                    | BA1051     | 1: 6000 |
| HRP Conjugated<br>AffiniPure Goat Anti-<br>rabbit IgG (H+L) | Bosterbio                    | BA1055     | 1: 6000 |

---
